1 **Biomechanical control of lysosomal secretion via the VAMP7 hub: a tug-of-war mechanism between**  
2 **VARP and LRRK1**

3 Guan Wang<sup>1,2</sup>, Sébastien Nola<sup>1,2</sup>, Simone Bovio<sup>3</sup>, Maïté Coppey-Moisan<sup>4</sup>, Frank Lafont<sup>3</sup>, and Thierry  
4 Galli<sup>1,2\*</sup>

5 <sup>1</sup> Membrane Traffic in Health & Disease, Institut Jacques Monod, CNRS UMR7592, INSERM U950,  
6 Sorbonne Paris-Cité, Université Paris Diderot, 75205 Paris, France

7 <sup>2</sup> Trafic membranaire normal et pathologique, Centre de Psychiatrie et Neurosciences, INSERM U894,  
8 Centre Hospitalier Sainte Anne, Sorbonne Paris-Cité, Université Paris Descartes, 75014 Paris, France

9 <sup>3</sup> Cellular Microbiology and Physics of Infection Group, Center for Infection and Immunity of Lille,  
10 CNRS UMR 8204, INSERM U1019, Institut Pasteur de Lille, Centre Hospitalier Régional de Lille,  
11 Université de Lille, France.

12 <sup>4</sup> Mechanotransduction: from Cell Surface to Nucleus, Institut Jacques Monod, CNRS UMR7592,  
13 Sorbonne Paris-Cité, Université Paris-Diderot, Paris, France

14 \* to whom correspondence should be addressed: Thierry Galli, INSERM U950, 15 rue Hélène Brion,  
15 75205 Paris, France, [thierry.galli@inserm.fr](mailto:thierry.galli@inserm.fr)

16 **Abstract**

17 The rigidity of the cell environment can vary tremendously between tissues and in pathological conditions.  
18 How this property may affect intracellular membrane dynamics is still largely unknown. Here, using  
19 atomic force microscopy, we found that cells deficient in the secretory lysosome v-SNARE VAMP7 were  
20 impaired in adapting to substrate rigidity. Conversely VAMP7-mediated secretion was stimulated by more  
21 rigid substrate and this regulation depended on the Longin domain of VAMP7. We further found that the  
22 Longin domain bound the kinase and retrograde trafficking adaptor LRRK1 and LRRK1 negatively  
23 regulated VAMP7-mediated exocytosis. Conversely, VARP, a VAMP7- and kinesin 1-interacting protein,  
24 further controlled the availability for secretion of peripheral VAMP7 vesicles and response of cells to  
25 mechanical constraints. We propose a mechanism whereby biomechanical constraints regulate VAMP7-  
26 dependent lysosomal secretion via LRRK1 and VARP tug-of-war control of the peripheral readily-  
27 releasable pool of secretory lysosomes.

28

## 29 **Introduction**

30 From the softest tissue like brain (<1kPa) to the hardest like bones (~100kPa), the elastic modulus of cell  
31 environment can greatly vary in the body of mammals. Matrix elasticity was shown to impact the  
32 differentiation of stem cells (Engler et al., 2006), cell spreading and morphology and the capacity to  
33 migrate (Tzvetkova-Chevolleau et al., 2008). Previous work showed that exocytosis and endocytosis are  
34 regulated by cell spreading and osmotic pressure (Gauthier et al., 2011) and membrane tension regulates  
35 secretory vesicle docking through a mechanism involving Munc18-a (Papadopoulos et al., 2015). The  
36 chemistry of the extracellular matrix also greatly varies in the different tissues and plays a role in  
37 regulating cell fate, morphology, and migration (Hakkinen et al., 2011). How substrate rigidity sensing  
38 may regulate exocytosis, which in turn regulates membrane tension, is still largely unknown. Secretory  
39 mechanisms involve SNAREs, the master actors of intracellular membrane fusion (Südhof and Rothman,  
40 2009). Exocytosis involves the formation of a SNARE complex comprising a vesicular SNARE (v-  
41 SNARE) on the vesicle side. The clostridial neurotoxin-insensitive VAMP7 mediates lysosomal secretion  
42 (Proux-Gillardeaux et al., 2005). Interestingly enough, VAMP7 was shown to play an essential role in cell  
43 migration and invasion (Proux-Gillardeaux et al., 2007; Steffen et al., 2008; Williams and Coppolino,  
44 2011). VAMP7 also contributes into the regulation of membrane composition of sphingolipids and GPI-  
45 anchored protein (Molino et al., 2015), which in turn modulates integrin dynamic and adhesion (Eich et  
46 al., 2016; van Zanten et al., 2009).

47 Here we took advantage of atomic force microscopy, micropatterned surfaces, pHluorin live imaging of  
48 single vesicle exocytosis (Balaji and Ryan, 2007) and substrate of controlled rigidity and composition to  
49 explore the role of lysosomal exocytosis in cell response to biomechanical constraints. Our results suggest  
50 that VAMP7-dependent lysosomal secretion responds to rigidity via control by its partners LRRK1 and  
51 VARP of the peripheral readily-releasable pool of lysosomes.

## 52 **Results**

### 53 **VAMP7 is required for fibroblast mechano-adaptation**

54 In order to understand the potential regulation of VAMP7 by the cell environment and its potential role in  
55 the cell response to mechanical constraints, we first localized VAMP7 in COS7 cells grown on  
56 micropatterned glass coverslips. We used cells grown on O pattern, a pattern with homogenous  
57 mechanical constraint as control, and Y pattern, a condition where cells are under peripheral traction  
58 forces (Albert and Schwarz, 2014). We found that VAMP7 was particularly enriched in actin-rich cell  
59 protrusions (Figure 1A and 1B), where contractile forces are generated, in cells grown on a Y pattern. We  
60 generated a VAMP7 knockout (KO) COS7 cell line using CRISPR/Cas9 approach (Figure S1A) and  
61 measured the cell elasticity on of control and VAMP7 KO COS7 cells by atomic force microscopy (Figure  
62 1C). The cells were grown on soft gels with a rigidity of 1.5 and 28 kPa, two conditions which induce  
63 cells to adapt their internal stiffness to the substrate rigidity (Solon et al., 2007). The VAMP7 KO cells  
64 reacted differently than control cells to the difference in substrate rigidity, with KO cells presenting a  
65 lower elastic modulus when plated on a more rigid substratum at opposite with the control cells (Figure  
66 1D). VAMP7 KO cells also appeared harder despite the environment. This suggested that VAMP7 is  
67 required for the proper cell response to environment changes in rigidity. The level of expression of  
68 VAMP7 further appeared to have a complex effect on the peripheral positioning of CD63 a marker of  
69 secretory lysosomes. Indeed, while KO of VAMP7 did not significantly affect CD63 subcellular  
70 localization compared to control cells on Y micropatterns, re-expression of the protein in KO cells  
71 modified the distribution of CD63 with an enrichment in cell necks (Figure 1E and 1F). Altogether, these  
72 experiments show that VAMP7 is required for proper cell response to biomechanical constraints.

### 73 **Longin-dependent regulation of VAMP7 exocytosis by mechanosensing**

74 We then measured the biophysical properties of individual VAMP7 and VAMP2 exocytic events using  
75 pHluorin-tagged molecules (Supplemental Video 1, 2) expressed in COS7 cells grown on surfaces of

76 controlled stiffness generated using PDMS gels of 1.5 and 28 kPa. We found that the frequency of  
77 exocytosis of VAMP7 had an up to ~1.5-fold increase on 28kPa in the presence of laminin compared to on  
78 1.5 kPa and to the absence of laminin respectively whereas VAMP2 exocytosis was insensitive to both  
79 substrate stiffness and chemistry (Figure 2A and 2B). This finding was confirmed using polyacrylamide  
80 gels coated by polylysine or laminin with significant stimulatory effect on VAMP7 exocytosis at 28kPa in  
81 the presence of laminin compared to 1.5kPa and the absence of laminin (Figure S1B). Then, we asked  
82 whether the regulation of VAMP7 exocytosis could be due to the presence of the Longin domain (LD), a  
83 main regulator of VAMP7. Indeed, we found that a mutant of VAMP7 lacking the LD ( $\Delta[1-125]$ -VAMP7)  
84 showed increased exocytosis as previously (Burgo et al., 2013) but its exocytic frequency was not affected  
85 by the substrate stiffness and chemistry and was already maximal on soft substrate (Figure 2C). We  
86 further analyzed the half-life of pHluorin signals which represents the kinetics of fusion pore opening and  
87 spreading followed by endocytosis and re-acidification (Figure S1C). VAMP2 and VAMP7 showed no  
88 significant difference in signal persistence depending on stiffness and chemistry. Altogether, these data  
89 suggest that VAMP7 exocytosis is modulated by substrate stiffness and composition in a LD-dependent  
90 manner. This mode of regulation did not appear to affect the mode of fusion (i.e. transient fusion vs full  
91 fusion) thus most likely affects the readily-releasable pool size and/or release probability of VAMP7.  
92 The previous results suggested that substrate stiffness could have a specific role in VAMP7 regulation. To  
93 more directly test the hypothesis of a role of membrane tension in VAMP7 exocytosis, we used hyper-  
94 osmotic changes and pHluorin imaging as previously. We found that high hyper-osmotic pressure (2x  
95 osmolarity) could instantaneously and reversibly reduce exocytosis frequency of VAMP7 independently  
96 of its LD, suggesting different mechanisms of action of membrane tension modulated by osmotic changes  
97 and substrate stiffness (Figure 2D and 2E, Supplemental Video 3). We also found that the half-life of  
98 pHluorin signals was moderately decreased following hyper-osmotic shocks and then spontaneously  
99 restored to normal level.  $\Delta$ LD-VAMP7 colocalized with full length VAMP7 in the cell periphery but was  
100 absent in some perinuclear endosomes (Figure 2F), likely corresponding to late endosomes and lysosomes

101 where VAMP7 is targeted in a LD/AP3-dependent manner (Kent et al., 2012; Martinez-Arca et al., 2003).  
102 Therefore, these experiments suggest that substrate rigidity specifically affect lysosomal secretion  
103 (VAMP7) and not early endosomal recycling (VAMP2,  $\Delta$ LD-VAMP7).

104 Altogether, pHluorin-imaging experiments led us to propose that membrane tension (such as modulated  
105 by osmotic shocks) is a master regulator of exocytosis independent of vesicle origin (both endosomal and  
106 lysosomal). In the contrary, the regulation of VAMP7 by substrate stiffness appeared not dependent on a  
107 pure biomechanical effect via plasma membrane tension but rather required proper sensing of the  
108 environment rigidity such as in the presence of laminin.

### 109 **The VAMP7 transport hub is regulated by mechanosensing**

110 VAMP7 interactome includes two proteins connected to molecular motors. LRRK1 interacts with VAMP7  
111 through its Ankyrin-repeat and leucine-rich repeat domain and also interacts with dynein (Kedashiro et al.,  
112 2015; Toyofuku et al., 2015). VARP interacts with VAMP7 through a small domain in its ankyrin repeat  
113 domains and also interacts with kinesin 1 (Burgo et al., 2009, 2012; Schäfer et al., 2012). Interestingly  
114 enough, sequence analysis showed that the ankyrin repeat of VARP which interacts with VAMP7 includes  
115 a 10aa sequence fully conserved in LRRK1 (Figure 3A). This lead us to wonder whether or not LRRK1  
116 and VARP may participate in the regulation of VAMP7 by substrate stiffness via its LD, in a potentially  
117 competitive manner. Firstly, to determine whether or not the interaction between VAMP7 and LRRK1  
118 was through the LD, we carried out in vitro binding assay with GST-tagged cytosolic domain (Cyto), and  
119 LD of VAMP7 protein. We found that LRRK1 had a ~10-fold stronger interaction with LD than with the  
120 full-length protein (Figure S2A and S2B). Next, we immunoprecipitated GFP-tagged LRRK1 or GFP-  
121 tagged VARP and assayed for coprecipitation of RFP-tagged full length and various deleted forms of  
122 VAMP7 from transfected COS7 cells (Figure 3B). We found that LRRK1 interacted with full length, LD  
123 and SNARE domain whereas the interaction of VARP was preferentially with full length and SNARE  
124 domain, with weak binding to the LD alone (Figure 3C and 3D). The spacer between LD and SNARE  
125 domain alone did not bind to either LRRK1 or VARP but appeared to increase the binding of SNARE

126 domain to both LRRK1 and VARP. This likely indicates that the spacer could help the folding of the  
127 SNARE domain required for interaction with both LRRK1 and VARP. Nevertheless, the spacer could be  
128 replaced by GGGGS motifs of similar length than the original spacer (20aa) without affecting neither  
129 LRRK1 nor VARP binding indicating that its role is not sequence-specific but only related to its length.  
130 We conclude that LRRK1 interacts with VAMP7 via the LD and its binding to VAMP7 is more sensitive  
131 than VARP to the presence of the LD. The loss of mechanosensing of exocytosis when the LD is removed  
132 thus likely results from the loss of a competition between LRRK1 and VARP. Unfortunately, with  
133 available reagents, competition for binding could not be more directly tested in cells or in vitro.  
134 Nevertheless, in good agreement with our hypothesis, triple labelling of exogenously expressed VAMP7,  
135 LRRK1 and VARP showed a striking colocalization spots of VAMP7 and VARP in cells tips and  
136 colocalization spots of VAMP7 and LRRK1, without VARP, in the cell center (Figure 3F).

137 To further decipher the role of LRRK1, we silenced its expression by shRNA and assayed for VAMP7  
138 exocytosis on soft and rigid substrate. We found that the exocytosis frequency of VAMP7 on soft  
139 substrate was increased to the same level as on rigid substrate in cells in which the expression of LRRK1  
140 was knocked down (Figure 3E). This suggested the striking hypothesis that LRRK1 is indispensable for  
141 the sensing of substrate softness.

142 According to previous work on LRRK1, VAMP7-LRRK1 interaction should recruit CLIP-170 and dynein  
143 allowing for retrograde transport on microtubules (Kedashiro et al., 2015). To further understand the  
144 potential role of LRRK1 in VAMP7 trafficking, we carried out live imaging of cells expressing GFP-  
145 LRRK1 and RFP-VAMP7, and found that VAMP7 and LRRK1 accumulated together in the cell center  
146 upon EGF stimulation (Figure S2C and S2D), a condition promotes perinuclear localization of LRRK1-  
147 containing endosomes (Hanafusa et al., 2011; Ishikawa et al., 2012). Analysis of confocal images taken  
148 from cells expressing GFP-tagged WT LRRK1, Y944F or K1243M mutants (constitutively active and  
149 inactive kinase form of LRRK1 respectively) and RFP-tagged VAMP7 showed that VAMP7 accumulated  
150 more in the perinuclear region in LRRK1 Y944F expressing cells, and more towards the cell periphery in

151 LRRK1 K1243M expressing cells (Figure S2E and S2F), suggesting that LRRK1 kinase activity enhanced  
152 the retrograde transport of VAMP7 vesicles into the perinuclear region. LRRK1 was previously found to  
153 play a role in autophagy (Toyofuku et al., 2015) but we did not find significant autophagy induction as  
154 seen by LC3-II imaging in cells on soft vs rigid substrates and western blotting (Figure S2G and S2H). We  
155 conclude that LRRK1 mediates retrograde transport of VAMP7 in a kinase-dependent activity and that  
156 LRRK1 is required for the control of VAMP7 exocytosis in response to substrate rigidity.

### 157 **Opposite roles of LRRK1 and VARP in mechanosensing**

158 A prediction from our previous results showing that VAMP7 exocytosis is required for mechanosensing  
159 (Figure 1C) and that LRRK1 and VARP generate a tug-of-war mechanism for the cell positioning of  
160 secretory lysosomes (Figures 3, S2) would be that LRRK1 and VARP should themselves play a role in  
161 mechanosensing. To test this hypothesis, we again used the previous assay with cells grown on substrates  
162 of different rigidities. We found that soft substrate promoted more perinuclear accumulation of VAMP7  
163 that rigid substrate (Figures 4A), similar to the effect of LRRK1 Y944F mutant. We found that VAMP7  
164 was localized more to the center in LRRK1-overexpressing cells. The opposite was found in VARP-  
165 overexpressing cells which showed decreased center-localized VAMP7. VARP-overexpressing cells  
166 further striking concentration of VAMP7 at the tips of cell protrusions. The effects of LRRK1 and VARP  
167 overexpression were not sensitive to substrate rigidity. This later data suggests that the effect of  
168 overexpression of these proteins dominated over the regulation that occurs between soft and rigid  
169 environment when they are expressed at physiological levels. In order to further decipher the role of  
170 VARP and LRRK1, we then used Crispr/Cas9 approach to knock out the expression of the proteins  
171 (Figure S1A), cultured the KO cells on substrate of 1.5 and 28 kPa, and assayed for perinuclear  
172 accumulation of RFP-VAMP7. We again reproduced the decreased perinuclear concentration of VAMP7  
173 on more rigid substrate in control cells. The effect of rigidity was lost in LRRK1 KO cells. In contrary, re-  
174 expression of LRRK1 in KO cells exacerbated central concentration of VAMP7 in a rigidity independent  
175 manner. Conversely, VARP KO showed a strong perinuclear accumulation of VAMP7 on rigid substrate

176 and this effect was reversed by re-expression of VARP. In this later case, the effect of substrate rigidity  
177 was visible after VARP re-expression in VARP KO cells. Altogether, these experiments using KO and  
178 overexpression approaches and culture on soft and rigid substrate suggest that LRRK1 and VARP  
179 provides a tug-of-war mechanism which mediates the fine tuning of VAMP7 subcellular localization  
180 regulated by mechanical constraints. In this regulatory mechanism, the precise expression level of LRRK1  
181 and VARP here appeared to be a critical parameter, further reinforcing the notion of a competitive  
182 mechanisms strongly dependent on the concentration and activity of LRRK1 and VARP.

183



## 184 **Discussion**

185 In this study, we found that VAMP7-dependent lysosomal exocytosis was required for cells to sense  
186 substrate rigidity and that the latter redistributed VAMP7 to the cell periphery in a LD, VARP- and  
187 LRRK1-dependent manner. LRRK1 and VARP, appeared to operate via an opposite control of the  
188 availability for secretion of peripheral VAMP7 vesicles in response to mechanical constraints, thus  
189 suggesting a tug-of-war mechanism.

190 VAMP7 KO cells showed increased elastic modulus on soft substrate and a decreased modulus on more  
191 rigid substrate compared with control cells. This likely suggest that the lack of VAMP7 may prevent cells  
192 from properly responding to mechanical constraints (Figure 1). Conversely, substrate rigidity increased  
193 exocytosis of VAMP7, but not VAMP2. This likely indicates the need for different types of membranes  
194 being transported to the cell surface depending on the biophysical properties of cell environment,  
195 particularly its rigidity. VAMP7 was shown to be important for phagophore formation and autophagosome  
196 secretion (Fader et al., 2012; Moreau et al., 2011) and rigidity was shown to increase autophagy (Ulbricht  
197 et al., 2013) but we did not find significant LC3-II induction in the different conditions tested so we do not  
198 think that substrate stiffness significantly activated autophagy in our experimental conditions. More likely  
199 we think our findings are related to the previous demonstration that VAMP7 mediates the transport of  
200 GPI-anchored proteins and lipid microdomains to the plasma membrane (Lafont et al., 1999; Molino et al.,  
201 2015; Pocard et al., 2007). Accordingly, increased exocytosis of GPI-anchored proteins was found in the  
202 secondary contractile phase during cell spreading (Gauthier et al., 2011). An attractive hypothesis would  
203 be that VAMP7 bring lipids which best fit a membrane under higher tension such as on more rigid  
204 substrates. Further studies are now required to decipher the precise signaling mechanism of how rigidity  
205 sensing and cortical tension regulate VAMP7 exocytosis.

206 We found that substrate rigidity increased and hyperosmotic shock inhibited the exocytosis frequency of  
207 VAMP7 following a remarkably quick adaptation of exocytosis frequency to strong changes in membrane  
208 tension. The effect of hyperosmotic shock on persistence of the signal at plasma membrane would be best

209 explained by decreased fusion pore flattening because fusion pore growth is promoted or even driven by  
210 the membrane tension (Bretou et al., 2014) and potential increased recovery of plasma membrane by  
211 endocytosis upon the osmotic shock. Our data thus fit well with the notion that exocytosis increases the  
212 surface area therefore decreases membrane tension, thus needs to be shut down to compensate for  
213 decreased membrane tension following hyperosmotic shock (Gauthier et al., 2011; Keren, 2011; Sens and  
214 Plastino, 2015). Nevertheless, we found similar effects of hyperosmotic shock on VAMP7 deleted of its  
215 LD while this was not the case for increased substrate stiffness. This indicates that acute changes of cell  
216 tension, such as osmotic shocks, acting likely via a direct effect on membrane tension, and secretory  
217 vesicles in close proximity with the plasma membrane, proceed from different mechanisms than substrate  
218 stiffness.

219 The mechanism unraveled here further suggest the involvement of two members of VAMP7's hub in  
220 mechanosensing-dependent regulation of transport and exocytosis. Here we found that LRRK1 strongly  
221 interacts with LD and SNARE domain of VAMP7 with a particularly strong interaction with LD *in vitro*.  
222 LRRK1 and VAMP7 were co-transported to the cell center upon EGF addition. Silencing LRRK1  
223 removed the regulation of VAMP7 exocytosis by substrate rigidity. LRRK1 overexpression concentrated  
224 VAMP7 in the cell center. This effect dominated over substrate rigidity, and was further emphasized by  
225 the kinase activity as it was previously shown in the case of the EGFR (Ishikawa et al., 2012). VARP  
226 mediates transport of VAMP7 to the cell periphery (Burgo et al., 2009, 2012; Hesketh et al., 2014). Here  
227 we found that VARP bound efficiently  $\Delta$ LD VAMP7 and its overexpression decreased the perinuclear  
228 pool of VAMP7 while increasing the peripheral one. Our data thus give a reasonable explanation for the  
229 increased exocytosis frequency of  $\Delta$ LD VAMP7 as the later would still efficiently bind to VARP and less  
230 to LRRK1. Altogether, the present data lead us to propose a tug-of-war mechanism with LRRK1 on the  
231 retrograde end and VARP on the anterograde end of VAMP7 trafficking. Our results further suggest that  
232 substrate stiffness would be able to regulate the tug-of-war between LRRK1 and VARP for lysosome  
233 positioning in the cell periphery and exocytosis. The effects of LRRK1 and VARP suggest that their

234 concentration in the cell is important for VAMP7 center to periphery distribution, fitting well with the  
235 notion of a tug-of-war mechanism. In conclusion, we suggest that VAMP7 lysosomal secretion is  
236 regulated by biomechanical constraints relayed by LRRK1 and VARP, a mechanism with potential broad  
237 relevance for plasma membrane dynamics in normal conditions (Koseoglu et al., 2015), infection  
238 (Chiaruttini et al., 2016; Larghi et al., 2013) and cancer (Steffen et al., 2008).

239

240 **Experimental Procedures**

241 Detailed procedures and reagent information are in the Supplemental Experimental Procedures. GraphPad  
242 Prism software were used for statistical analyses. Data were analyzed using Welsh's t-test or one-way  
243 ANOVA followed by a Tukey post hoc test as indicated in legends.

244 **Author Contributions**

245 Conceptualization, G.W. and T.G.; Methodology, G.W. and S.N.; Software, G.W.; Investigation, G.W.,  
246 S.N. and S.B.; Writing – Original Draft, G.W. and T.G.; Funding Acquisition, G.W. and T.G.;  
247 Supervision, T.G., F.L. and M.C.

248 **Acknowledgements**

249 We are grateful to Dr. Michael Kozlov (Tel Aviv University, Israel) for critical reading of a preliminary  
250 version of the manuscript. We thank V. Proux-Gillardeaux for helpful discussion, C. Vannier and A.  
251 Verraes for providing materials. We are grateful to Dr. H. Hanafusa for the LRRK1 vectors. Work in our  
252 group was funded by grants from INSERM, CNRS, Association Française contre les Myopathies  
253 (Research Grant 16612), the French National Research Agency (*NeuroImmunoSynapse* ANR-13-BSV2-  
254 0018-02), the Ecole des Neurosciences de Paris (ENP), the Fondation pour la Recherche Médicale (FRM),  
255 *Who am I?* Labex (Idex ANR-11-IDEX-0005-01), awards of the Association Robert Debré pour la  
256 Recherche Médicale to T.G. and fellowship from the Region Ile-de-France in the framework of DIM  
257 Cerveau&Pensée and from FRM (FDT20150532766) to G.W. We acknowledge the ImagoSeine facility,  
258 and the France BioImaging infrastructure supported by ANR (10-EQPX-04-01) and the EU-FEDER  
259 (12,001,407) as part of “Investments of the future” program.

## 260 References

- 261 *Albert, P.J., and Schwarz, U.S. (2014). Dynamics of cell shape and forces on micropatterned substrates*  
262 *predicted by a cellular Potts model. Biophys J* 106, 2340–2352.
- 263 *Balaji, J., and Ryan, T.A. (2007). Single-vesicle imaging reveals that synaptic vesicle exocytosis and*  
264 *endocytosis are coupled by a single stochastic mode. Proc Natl Acad Sci U S A* 104, 20576–20581.
- 265 *Bretou, M., Jouannot, O., Fanget, I., Pierobon, P., Larochette, N., Gestraud, P., Guillon, M., Emiliani,*  
266 *V., Gasman, S., Desnos, C., et al. (2014). Cdc42 controls the dilation of the exocytotic fusion pore by*  
267 *regulating membrane tension. Mol Biol Cell* 25, 3195–3209.
- 268 *Burgo, A., Sotirakis, E., Simmler, M.-C., Verraes, A., Chamot, C., Simpson, J.C., Lanzetti, L., Proux-*  
269 *Gillardeaux, V., and Galli, T. (2009). Role of Varp, a Rab21 exchange factor and TI-VAMP/VAMP7*  
270 *partner, in neurite growth. EMBO Rep* 10, 1117–1124.
- 271 *Burgo, A., Proux-Gillardeaux, V., Sotirakis, E., Bun, P., Casano, A., Verraes, A., Liem, R.K.H.,*  
272 *Formstecher, E., Coppey-Moisan, M., and Galli, T. (2012). A molecular network for the transport of*  
273 *the TI-VAMP/VAMP7 vesicles from cell center to periphery. Dev Cell* 23, 166–180.
- 274 *Burgo, A., Casano, A.M., Kuster, A., Arold, S.T., Wang, G., Nola, S., Verraes, A., Dingli, F., Loew, D.,*  
275 *and Galli, T. (2013). Increased activity of the vesicular soluble N-ethylmaleimide-sensitive factor*  
276 *attachment protein receptor TI-VAMP/VAMP7 by tyrosine phosphorylation in the Longin domain. J*  
277 *Biol Chem* 288, 11960–11972.
- 278 *Chiaruttini, G., Piperno, G.M., Jouve, M., De Nardi, F., Larghi, P., Peden, A.A., Baj, G., Müller, S.,*  
279 *Valitutti, S., Galli, T., et al. (2016). The SNARE VAMP7 Regulates Exocytic Trafficking of Interleukin-*  
280 *12 in Dendritic Cells. Cell Rep* 14, 2624–2636.
- 281 *Eich, C., Manzo, C., de Keijzer, S., Bakker, G.-J., Reinieren-Beeren, I., García-Parajo, M.F., and*  
282 *Cambi, A. (2016). Changes in membrane sphingolipid composition modulate dynamics and adhesion of*  
283 *integrin nanoclusters. Sci Rep* 6, 20693.
- 284 *Engler, A.J., Sen, S., Sweeney, H.L., and Discher, D.E. (2006). Matrix elasticity directs stem cell*  
285 *lineage specification. Cell* 126, 677–689.
- 286 *Fader, C.M., Aguilera, M.O., and Colombo, M.I. (2012). ATP is released from autophagic vesicles to*  
287 *the extracellular space in a VAMP7-dependent manner. Autophagy* 8, 1741–1756.
- 288 *Gauthier, N.C., Fardin, M.A., Roca-Cusachs, P., and Sheetz, M.P. (2011). Temporary increase in*  
289 *plasma membrane tension coordinates the activation of exocytosis and contraction during cell*  
290 *spreading. Proc Natl Acad Sci U S A* 108, 14467–14472.
- 291 *Hakkinen, K.M., Harunaga, J.S., Doyle, A.D., and Yamada, K.M. (2011). Direct comparisons of the*  
292 *morphology, migration, cell adhesions, and actin cytoskeleton of fibroblasts in four different three-*  
293 *dimensional extracellular matrices. Tissue Eng Part A* 17, 713–724.
- 294 *Hanafusa, H., Ishikawa, K., Kedashiro, S., Saigo, T., Iemura, S.-I., Natsume, T., Komada, M., Shibuya,*  
295 *H., Nara, A., and Matsumoto, K. (2011). Leucine-rich repeat kinase LRRK1 regulates endosomal*  
296 *trafficking of the EGF receptor. Nat Commun* 2, 158.

- 297 *Hesketh, G.G., Pérez-Dorado, I., Jackson, L.P., Wartosch, L., Schäfer, I.B., Gray, S.R., McCoy, A.J.,*  
298 *Zeldin, O.B., Garman, E.F., Harbour, M.E., et al. (2014). VARP is recruited on to endosomes by direct*  
299 *interaction with retromer, where together they function in export to the cell surface. Dev Cell 29, 591–*  
300 *606.*
- 301 *Ishikawa, K., Nara, A., Matsumoto, K., and Hanafusa, H. (2012). EGFR-dependent phosphorylation of*  
302 *leucine-rich repeat kinase LRRK1 is important for proper endosomal trafficking of EGFR. Mol Biol*  
303 *Cell 23, 1294–1306.*
- 304 *Kedashiro, S., Pastuhov, S.I., Nishioka, T., Watanabe, T., Kaibuchi, K., Matsumoto, K., and Hanafusa,*  
305 *H. (2015). LRRK1-phosphorylated CLIP-170 regulates EGFR trafficking by recruiting p150Glued to*  
306 *microtubule plus ends. J Cell Sci 128, 385–396.*
- 307 *Kent, H.M., Evans, P.R., Schäfer, I.B., Gray, S.R., Sanderson, C.M., Luzio, J.P., Peden, A.A., and*  
308 *Owen, D.J. (2012). Structural basis of the intracellular sorting of the SNARE VAMP7 by the AP3*  
309 *adaptor complex. Dev Cell 22, 979–988.*
- 310 *Keren, K. (2011). Membrane tension leads the way. Proc Natl Acad Sci U S A 108, 14379–14380.*
- 311 *Koseoglu, S., Peters, C.G., Fitch-Tewfik, J.L., Aisiku, O., Danglot, L., Galli, T., and Flaumenhaft, R.*  
312 *(2015). VAMP-7 links granule exocytosis to actin reorganization during platelet activation. Blood 126,*  
313 *651–660.*
- 314 *Lafont, F., Verkade, P., Galli, T., Wimmer, C., Louvard, D., and Simons, K. (1999). Raft association of*  
315 *SNAP receptors acting in apical trafficking in Madin-Darby canine kidney cells. Proc Natl Acad Sci U*  
316 *S A 96, 3734–3738.*
- 317 *Larghi, P., Williamson, D.J., Carpiér, J.-M., Dogniaux, S., Chemin, K., Bohineust, A., Danglot, L.,*  
318 *Gaus, K., Galli, T., and Hivroz, C. (2013). VAMP7 controls T cell activation by regulating the*  
319 *recruitment and phosphorylation of vesicular Lat at TCR-activation sites. Nat Immunol 14, 723–731.*
- 320 *Martinez-Arca, S., Rudge, R., Vacca, M., Raposo, G., Camonis, J., Proux-Gillardeaux, V., Daviet, L.,*  
321 *Formstecher, E., Hamburger, A., Filippini, F., et al. (2003). A dual mechanism controlling the*  
322 *localization and function of exocytic v-SNAREs. Proc Natl Acad Sci U S A 100, 9011–9016.*
- 323 *Molino, D., Nola, S., Lam, S.M., Verraes, A., Proux-Gillardeaux, V., Boncompain, G., Perez, F., Wenk,*  
324 *M., Shui, G., Danglot, L., et al. (2015). Role of tetanus neurotoxin insensitive vesicle-associated*  
325 *membrane protein in membrane domains transport and homeostasis. Cell Logist 5, e1025182.*
- 326 *Moreau, K., Ravikumar, B., Renna, M., Puri, C., and Rubinsztein, D.C. (2011). Autophagosome*  
327 *precursor maturation requires homotypic fusion. Cell 146, 303–317.*
- 328 *Papadopoulos, A., Gomez, G.A., Martin, S., Jackson, J., Gormal, R.S., Keating, D.J., Yap, A.S., and*  
329 *Meunier, F.A. (2015). Activity-driven relaxation of the cortical actomyosin II network synchronizes*  
330 *Munc18-1-dependent neurosecretory vesicle docking. Nat Commun 6, 6297.*
- 331 *Pocard, T., Le Bivic, A., Galli, T., and Zurzolo, C. (2007). Distinct v-SNAREs regulate direct and*  
332 *indirect apical delivery in polarized epithelial cells. J Cell Sci 120, 3309–3320.*
- 333 *Proux-Gillardeaux, V., Rudge, R., and Galli, T. (2005). The tetanus neurotoxin-sensitive and*  
334 *insensitive routes to and from the plasma membrane: fast and slow pathways? Traffic 6, 366–373.*

- 335 *Proux-Gillardeaux, V., Raposo, G., Irinopoulou, T., and Galli, T. (2007). Expression of the Longin*  
336 *domain of TI-VAMP impairs lysosomal secretion and epithelial cell migration. Biol Cell 99, 261–271.*
- 337 *Schäfer, I.B., Hesketh, G.G., Bright, N.A., Gray, S.R., Pryor, P.R., Evans, P.R., Luzio, J.P., and Owen,*  
338 *D.J. (2012). The binding of Varp to VAMP7 traps VAMP7 in a closed, fusogenically inactive*  
339 *conformation. Nat Struct Mol Biol 19, 1300–1309.*
- 340 *Sens, P., and Plastino, J. (2015). Membrane tension and cytoskeleton organization in cell motility. J*  
341 *Phys Condens Matter 27, 273103.*
- 342 *Solon, J., Levental, I., Sengupta, K., Georges, P.C., and Janmey, P.A. (2007). Fibroblast adaptation and*  
343 *stiffness matching to soft elastic substrates. Biophys J 93, 4453–4461.*
- 344 *Steffen, A., Le Dez, G., Poincloux, R., Recchi, C., Nassoy, P., Rottner, K., Galli, T., and Chavrier, P.*  
345 *(2008). MT1-MMP-dependent invasion is regulated by TI-VAMP/VAMP7. Curr Biol 18, 926–931.*
- 346 *Südhof, T.C., and Rothman, J.E. (2009). Membrane fusion: grappling with SNARE and SM proteins.*  
347 *Science 323, 474–477.*
- 348 *Toyofuku, T., Morimoto, K., Sasawatari, S., and Kumanogoh, A. (2015). Leucine-Rich Repeat Kinase 1*  
349 *Regulates Autophagy through Turning On TBC1D2-Dependent Rab7 Inactivation. Mol Cell Biol 35,*  
350 *3044–3058.*
- 351 *Tzvetkova-Chevolleau, T., Stéphanou, A., Fuard, D., Ohayon, J., Schiavone, P., and Tracqui, P. (2008).*  
352 *The motility of normal and cancer cells in response to the combined influence of the substrate rigidity*  
353 *and anisotropic microstructure. Biomaterials 29, 1541–1551.*
- 354 *Ulbricht, A., Eppler, F.J., Tapia, V.E., van der Ven, P.F.M., Hampe, N., Hersch, N., Vakeel, P., Stadel,*  
355 *D., Haas, A., Saftig, P., et al. (2013). Cellular mechanotransduction relies on tension-induced and*  
356 *chaperone-assisted autophagy. Curr Biol 23, 430–435.*
- 357 *Williams, K.C., and Coppolino, M.G. (2011). Phosphorylation of membrane type 1-matrix*  
358 *metalloproteinase (MT1-MMP) and its vesicle-associated membrane protein 7 (VAMP7)-dependent*  
359 *trafficking facilitate cell invasion and migration. J Biol Chem 286, 43405–43416.*
- 360 *Van Zanten, T.S., Cambi, A., Koopman, M., Joosten, B., Figdor, C.G., and Garcia-Parajo, M.F. (2009).*  
361 *Hotspots of GPI-anchored proteins and integrin nanoclusters function as nucleation sites for cell*  
362 *adhesion. Proc Natl Acad Sci U S A 106, 18557–18562.*
- 363
- 364
- 365



366 **Figure legends**

367 **Figure 1. VAMP7 is required for fibroblast mechano-adaptation.**

368 (A) Projection of COS7 cells plated on micropatterns. n: O=27, Y=27 cells. Scale bar, 10 $\mu$ m.

369 (B) Quantification of RFP-VAMP7 intensity from cell center to cell periphery. Graph shows mean  $\pm$  95%  
370 CI (dash lines).

371 (C) Heatmaps of cell elasticity plated on laminin coated PDMS gels of 1.5 kPa or 28 kPa. Measurements  
372 were systematically made in a 20 $\mu$ m width rectangle area whose typical placement was indicated by the  
373 black box. Scale bar, 10 $\mu$ m.

374 (D) Quantification of cell elastic modulus E. Graph shows scatter plot with mean  $\pm$  95% CI. Each point  
375 represents the median E value of a cell pooled from four independent experiments. \*p<0.05, \*\*p<0.01,  
376 and \*\*\*p<0.0001, ANOVA with Tukey's post hoc or Welsh's t-test was used as indicated.

377 (E) Projection of control, VAMP7 KO, and VAMP7 KO re-expressing GFP-VAMP7 cells plated on Y  
378 micropatterns. N=43, 59, 63 cells respectively. Scale bar, 10 $\mu$ m.

379 (F) Quantification of CD63 immunofluorescence in cell center area (<10 $\mu$ m from the geometry center),  
380 neck area (between 10 $\mu$ m and 20 $\mu$ m) and tip area (>20 $\mu$ m). Graph shows scatter plot with mean  $\pm$  95%  
381 CI. Each point represents the value obtained from cells from two independent experiments. \*\*p<0.01 and  
382 \*\*\*p<0.001, ANOVA with Tukey's post hoc.

383 **Figure 2. VAMP7-mediated exocytosis is regulated by mechanosensing.**

384 (A-C). Quantification of exocytic events in COS7 cells expressing pHluorin-tagged VAMP2, VAMP7 or  
385  $\Delta$ LD( $\Delta$ [1-125]) VAMP7. Cells were plated on poly-lysine or laminin coated PDMS gel of 1.5kPa or 28kPa  
386 for 18-24 hours. Graph shows scatter plot with mean  $\pm$  95%CI. Each point represents the exocytic rate of  
387 cells from two or more independent experiments. \*\*p<0.01, Welsh's t-test.

388 (D and E). Quantification of exocytic rate and pHluorin signals' half-life in COS7 cells expressing  
389 pHluorin-tagged VAMP7 or  $\Delta$ LD-VAMP7. Cells were plated on laminin coated 28kPa PDMS gels for 18-  
390 24hours. Hyperosmotic shocks were performed by perfusing the 2X osmolality buffer and then washed  
391 out by 1X buffer. At each time point, the exocytic rate in the following minute was calculated. Graph  
392 shows mean  $\pm$  95% CI (dash lines). n>10, pooled from 2 or more independent experiments.

393 (F). Representative COS7 cell co-expressing RFP-tagged  $\Delta$ LD( $\Delta$ [1-120]) VAMP7 and GFP tagged full  
394 length VAMP7. Filled arrowheads show the colocalization. Empty arrowheads indicate structures  
395 containing only GFP-VAMP7. Scale bar, 10 $\mu$ m.

396 **Figure 3. LRRK1 binds VAMP7 and is required for the mechanosensing of VAMP7 exocytosis.**

397 (A) Alignment showing that LRRK1 shares a conserved ankyrin repeat domain with VARP, in its  
398 interaction domain with VAMP7.

399 (B) Domain organization of rat VAMP7. Sp, spacer; TM, transmembrane. The constructs used for co-  
400 immunoprecipitation assay were shown below.

401 (C and D) Assays of binding of LRRK1 and VARP to VAMP7. Lysates from COS7 cells co-expressing  
402 GFP-LRRK1 or GFP-VARP with indicated RFP-tagged construction of VAMP7 were  
403 immunoprecipitated (IP) with GFP-binding protein (GBP) fixed on sepharose beads. Precipitated proteins



404 were subjected to SDS-PAGE, and the blots were stained with antibodies against indicated target proteins.  
405 EGFP protein and mRFP protein were used as control for nonspecific binding. The experiment has been  
406 independently repeated three times with similar results.

407 (E) Quantification of exocytic events in COS7 cells co-expressing VAMP7-phluorin with control shRNA  
408 or LRRK1-shRNA, growing on laminin coated PDMS gels for 18-24hours. Graph shows scatter plot with  
409 mean  $\pm$  95% CI. Each point represents the exocytic rate of cells from two independent experiments.  
410 \*\* $p$ <0.01, Welsh's t-test.

411 (F) Representative COS7 cell co-expressing RFP-VAMP7, FLAG-VARP and GFP-LRRK1. Filled  
412 arrowheads indicate triple colocalization. Empty arrowheads indicate structures where either FLAG-  
413 VARP or GFP-LRRK1 is missing or dominant. Scale bar, 10 $\mu$ m.

414 **Figure 4. LRRK1 and VARP have opposite roles of in rigidity dependent VAMP7 positioning.**

415 (A) Representative WT COS7 cells co-expressing RFP-tagged VAMP7 with GFP-tagged LRRK1 or  
416 VARP, growing on laminin coated PDMS gels.

417 (C) Representative Control, LRRK1 KO and VARP KO COS7 cells growing on laminin coated PDMS  
418 gels. Control and KO cells were transfected with RFP-VAMP7 and EGFP as indicated, and with GFP-  
419 LRRK1 and VARP in rescue conditions. Images show z-projection of confocal stack. Arrowheads show  
420 the colocalization in cell protrusions. Scale bar: 10 $\mu$ m.

421 (B and D) Quantification of RFP-VAMP7 fluorescence in the perinuclear region. Graph shows scatter plot  
422 with mean  $\pm$  95% CI. Each point represents the value obtained from a cell pooled from two independent  
423 experiments. \* $p$ <0.05, \*\* $p$ <0.01 and \*\*\*\* $p$ <0.0001, ANOVA with Tukey's post hoc or Welsh's t-test was  
424 used as indicated.

425

Figure 1

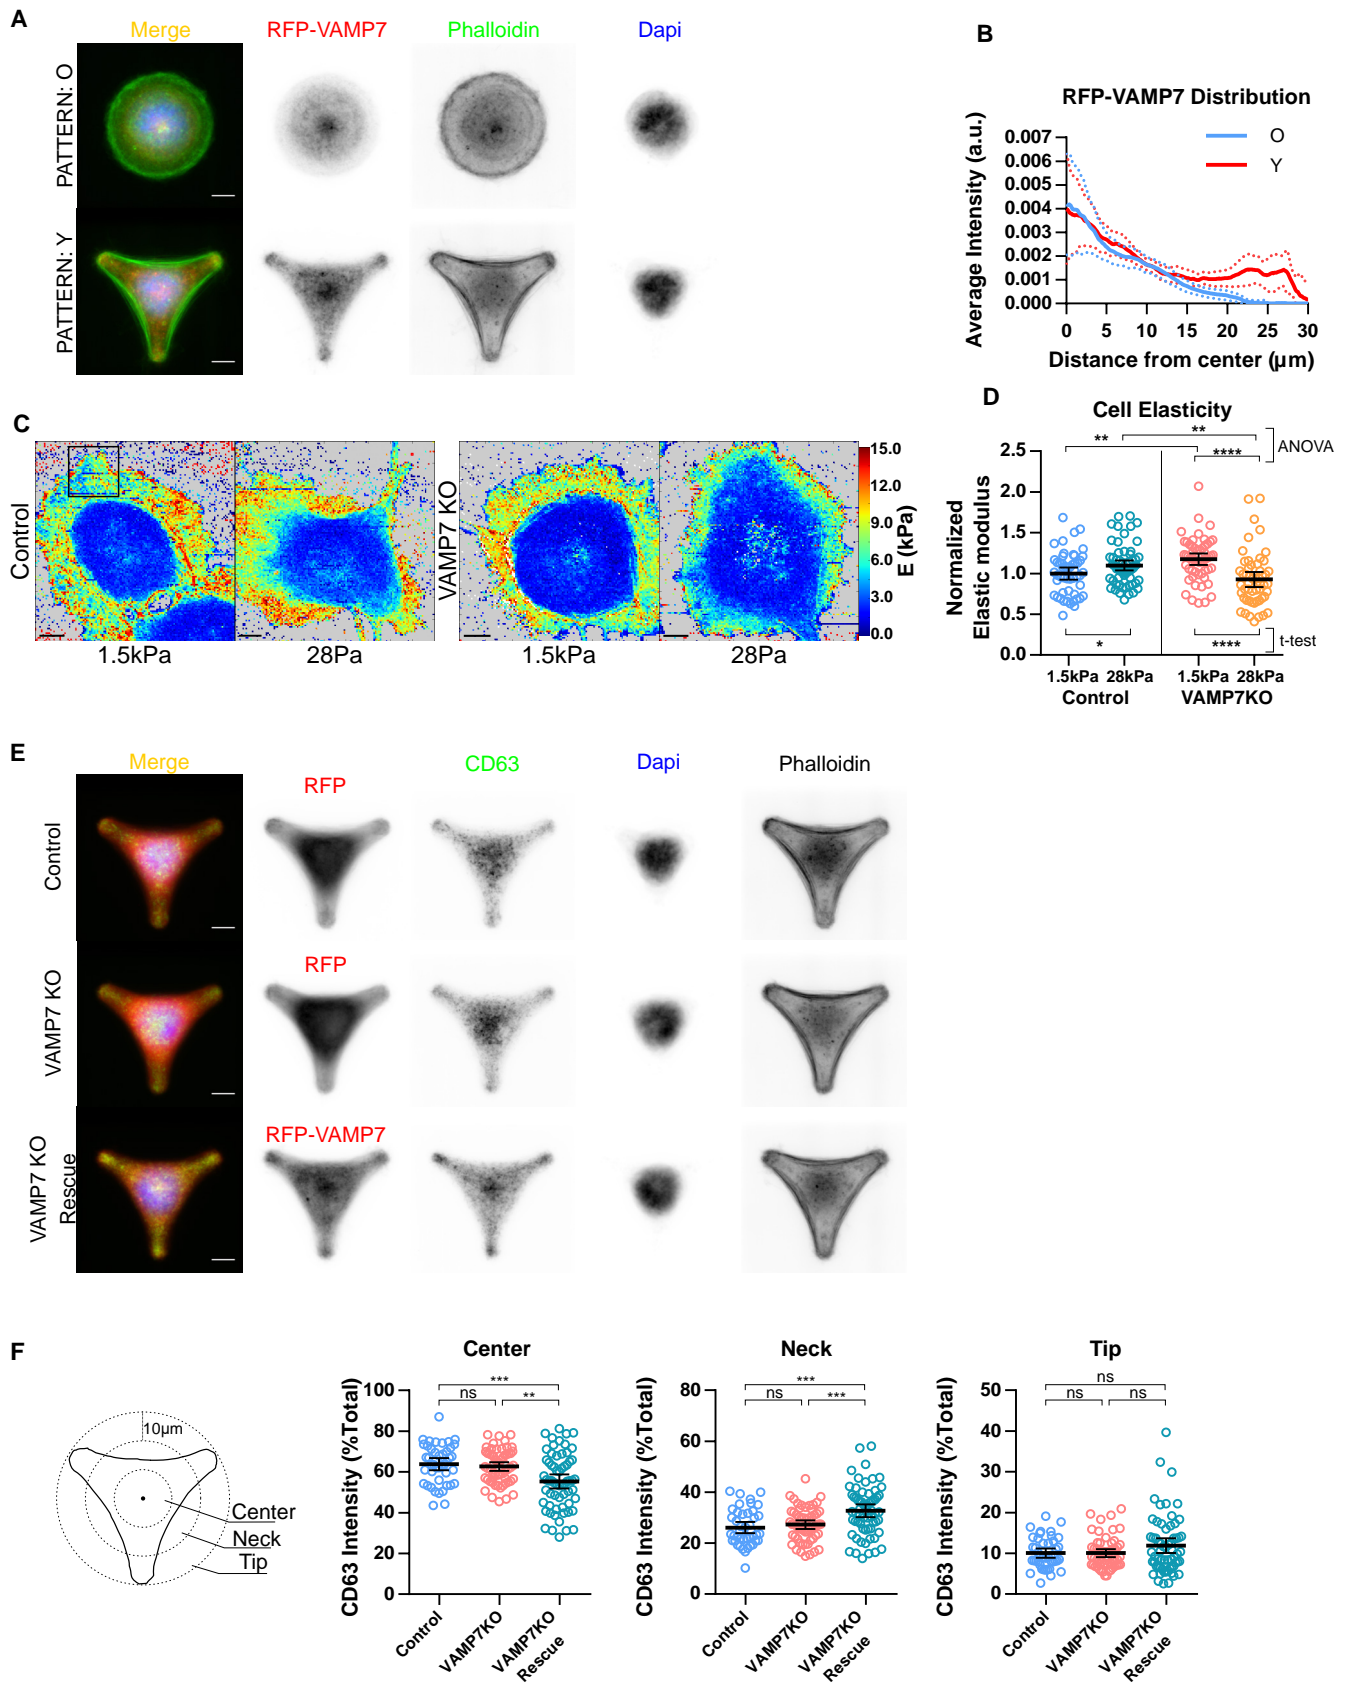

Figure 2

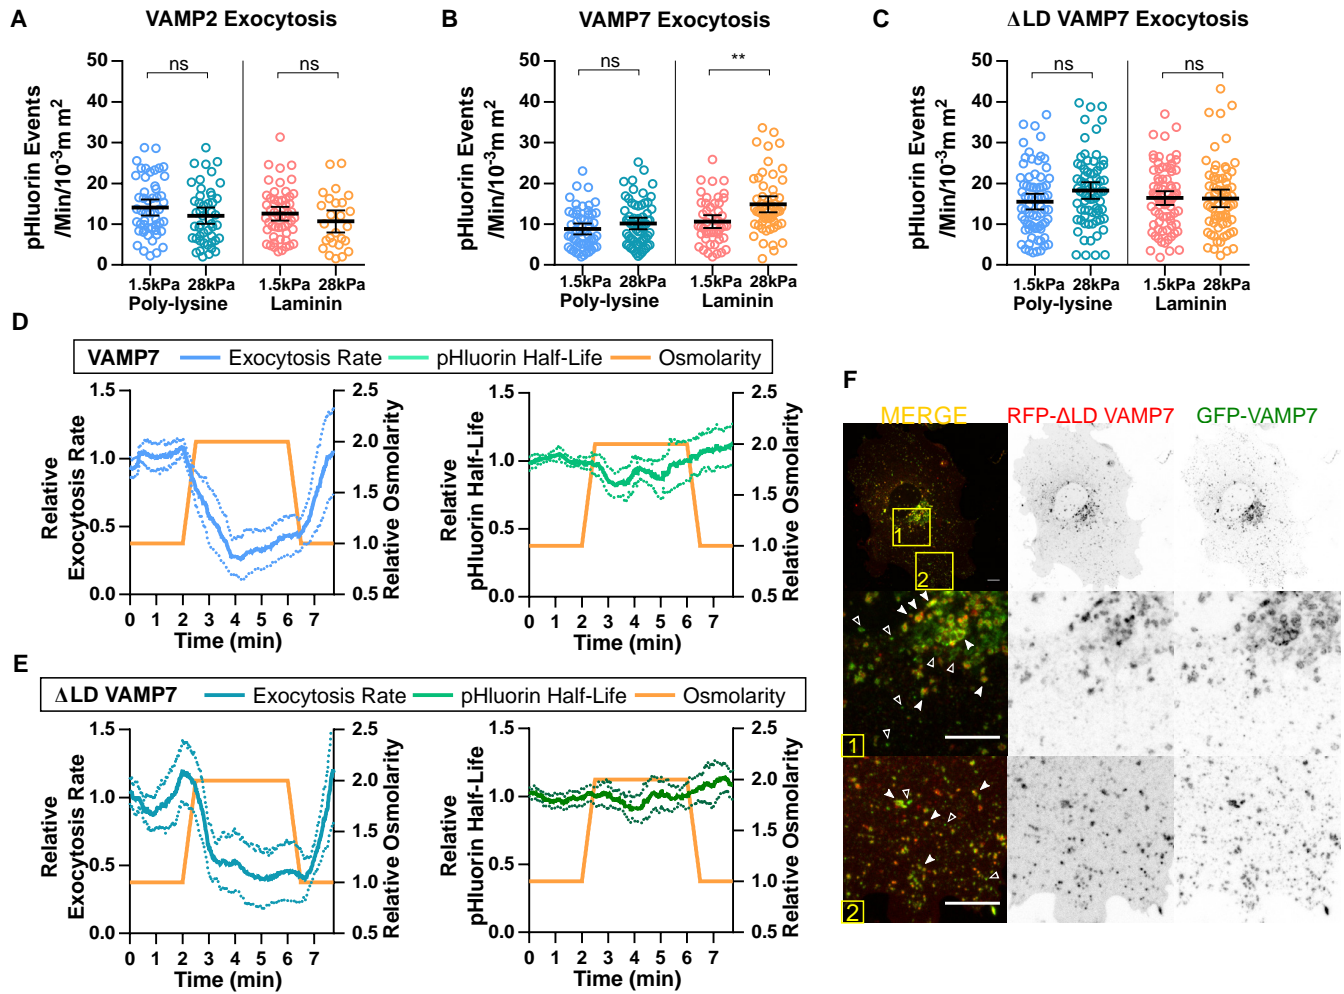

### Figure 3

**A**

VAMP7 HUMAN ANK repeat 7 (668-698): REVEKLLRAVADGDLEMVRYLLEWTEEDLED  
 LRRK1 HUMAN ANK repeat 1 (86-116): EKGQLLSIPAAYGDLEMVRYLLSKRLVELPT  
 Consensus: . : : \* . \* \* \* \* \* \* \* . : \*

**B**

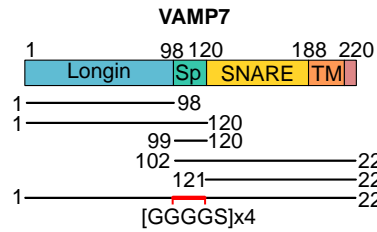

**C**

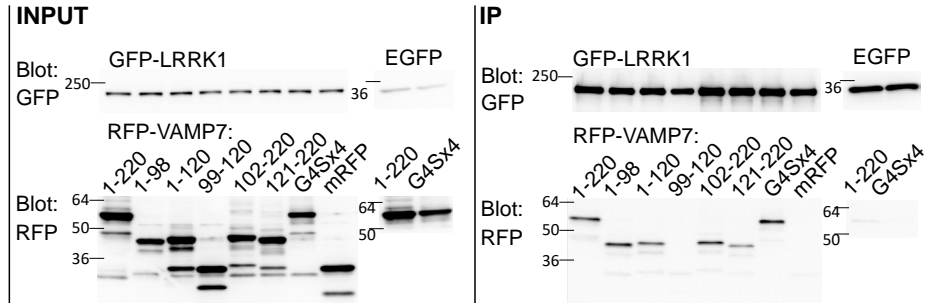

**D**

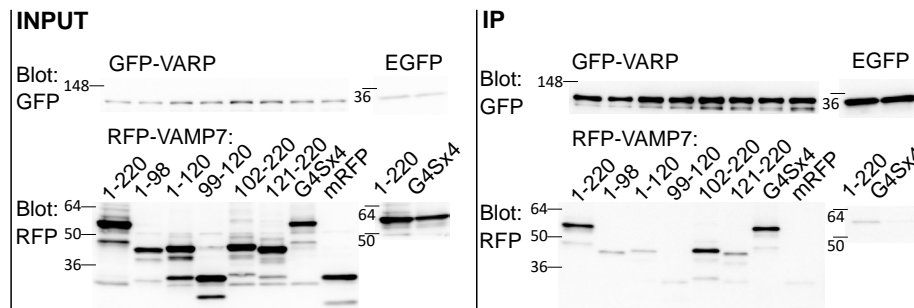

**E**

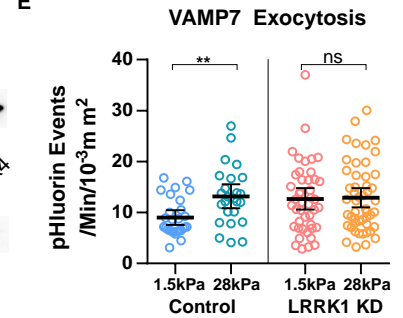

**F**

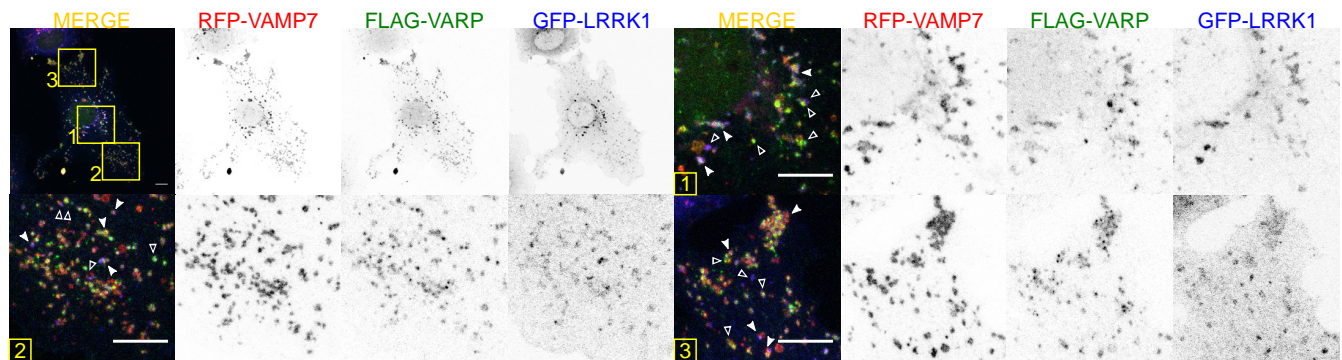



Figure 4

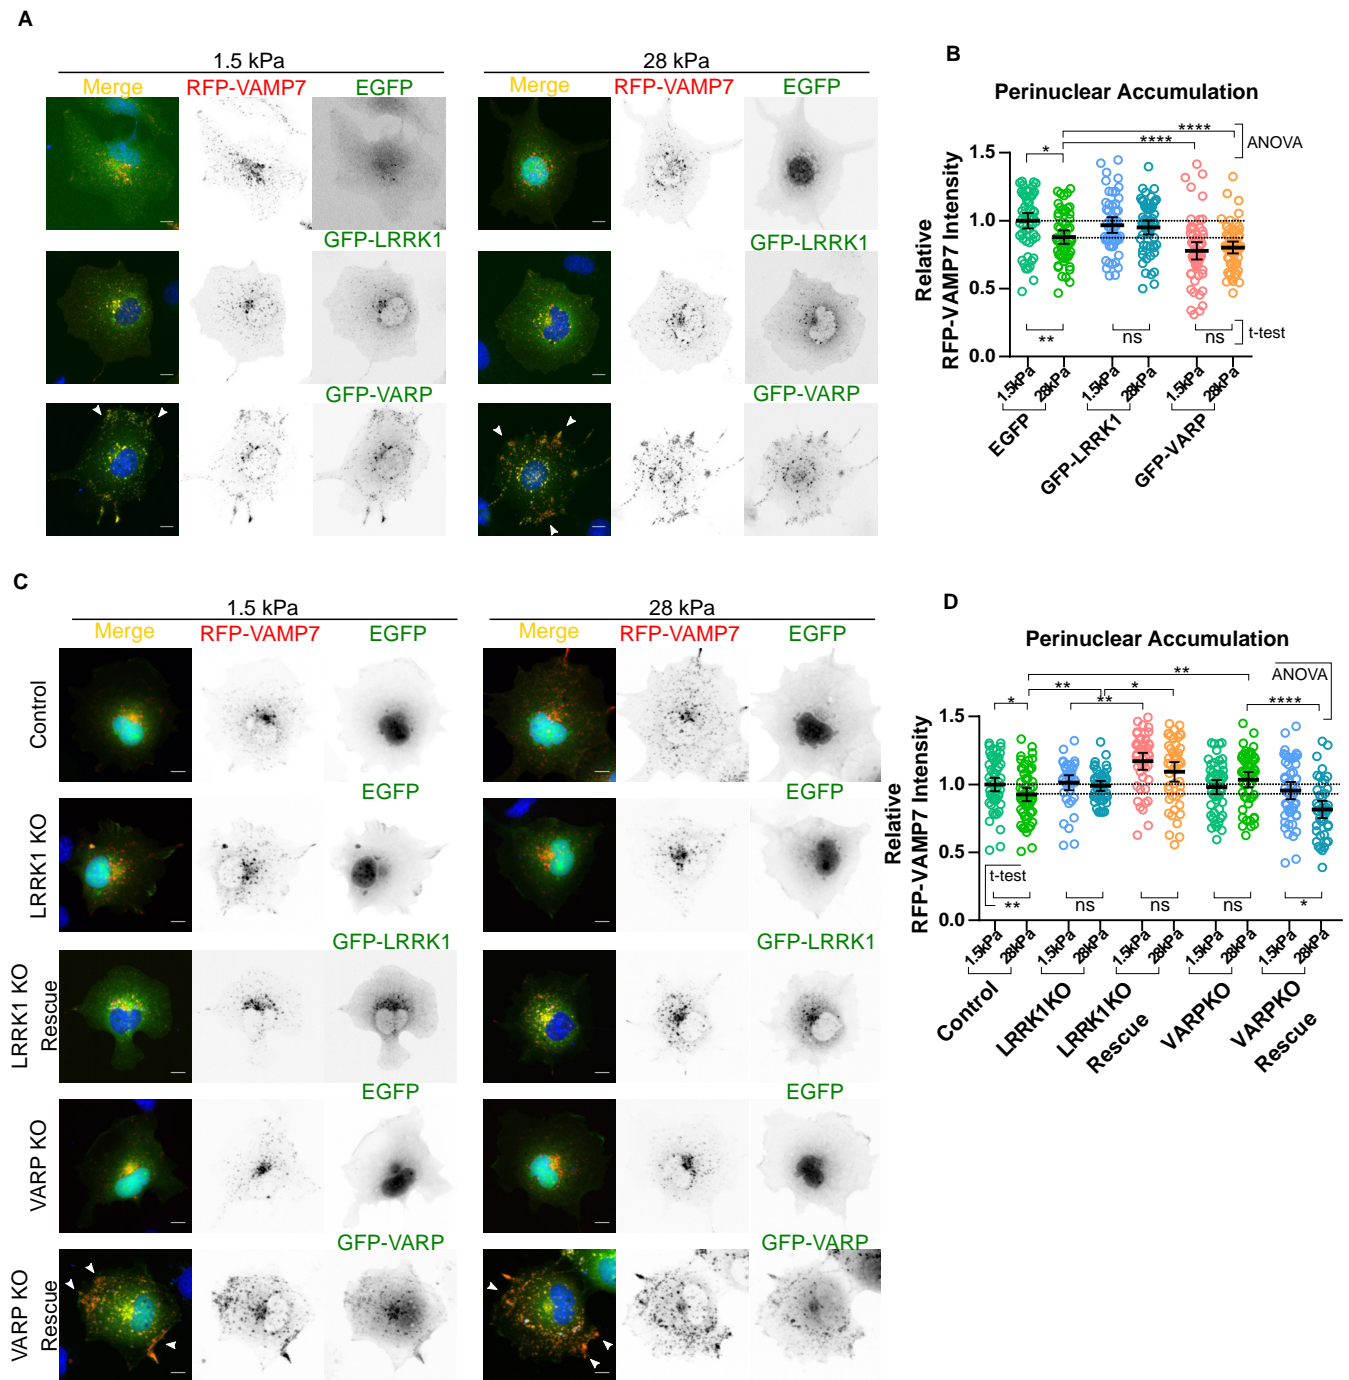

Source: http://www.biorxiv.org/content/10.1101/159285v1.full.pdf
